# Supplementary material
Source: PubMed Central journal article supplement (PMC9022605)

Fig S1

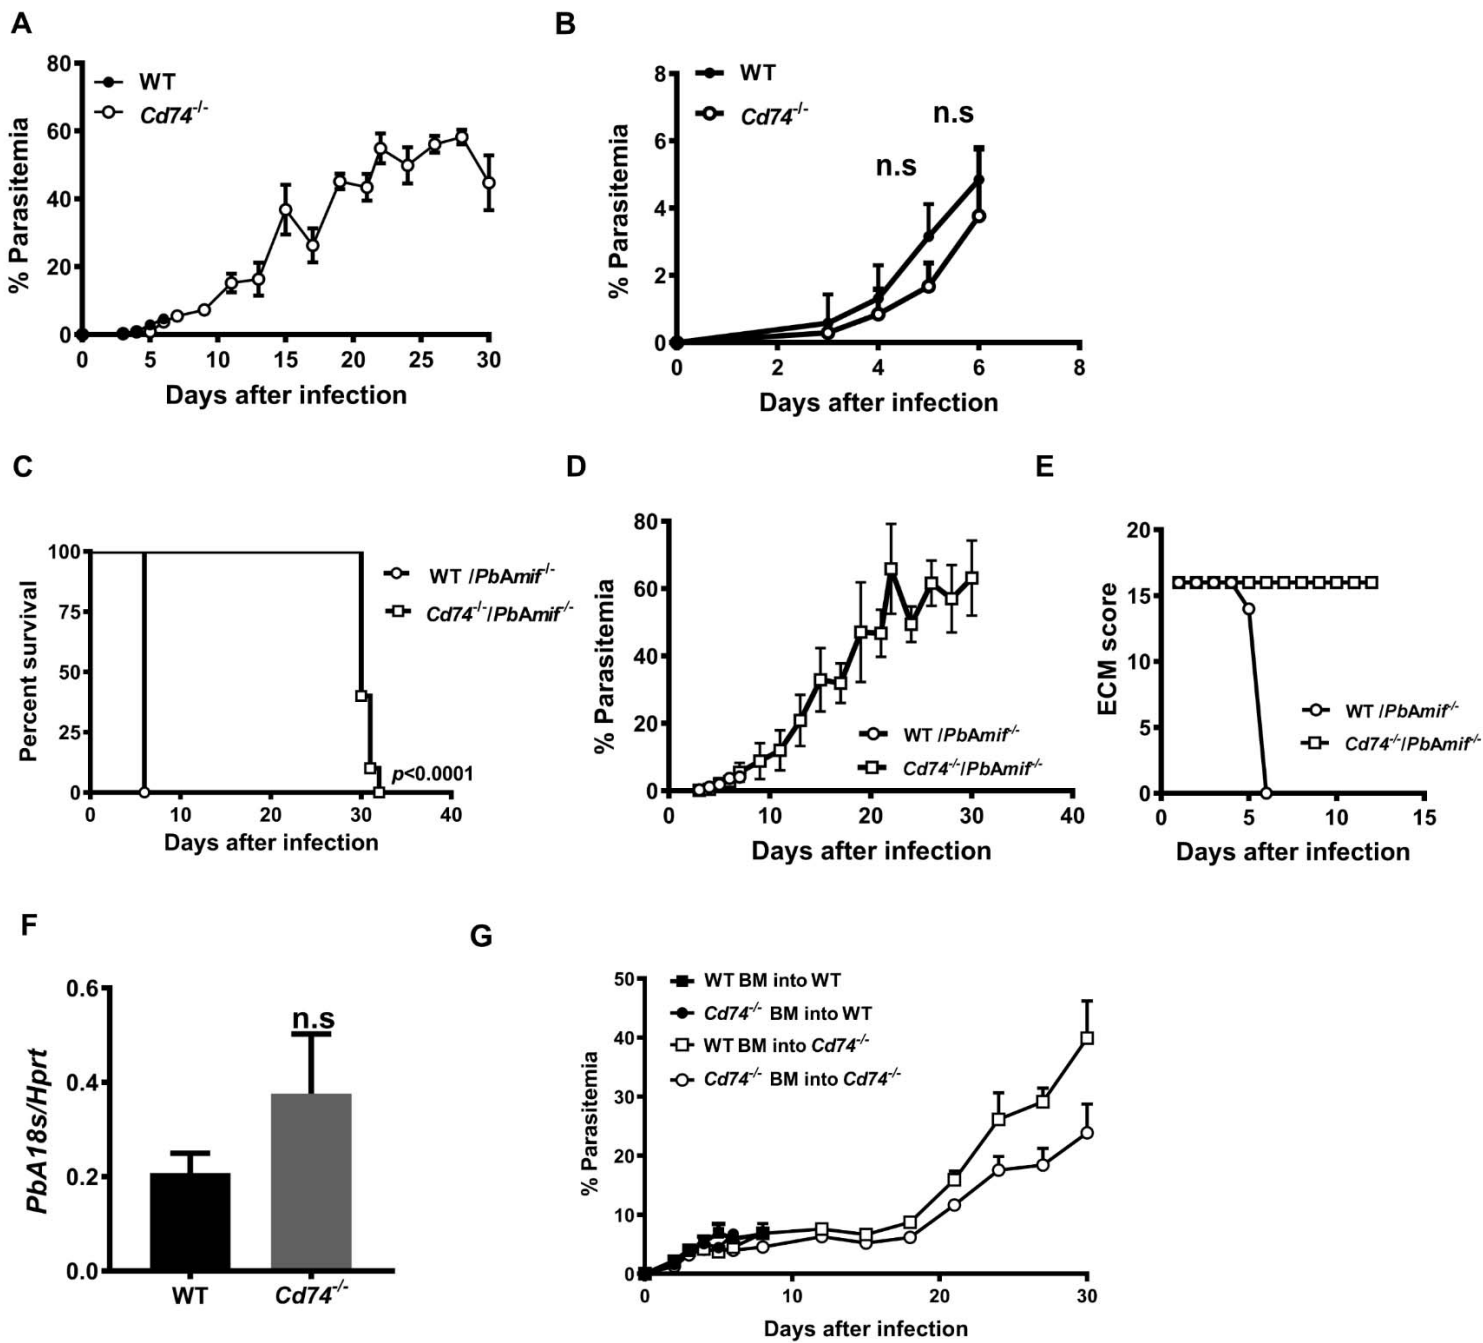

Fig S2

A

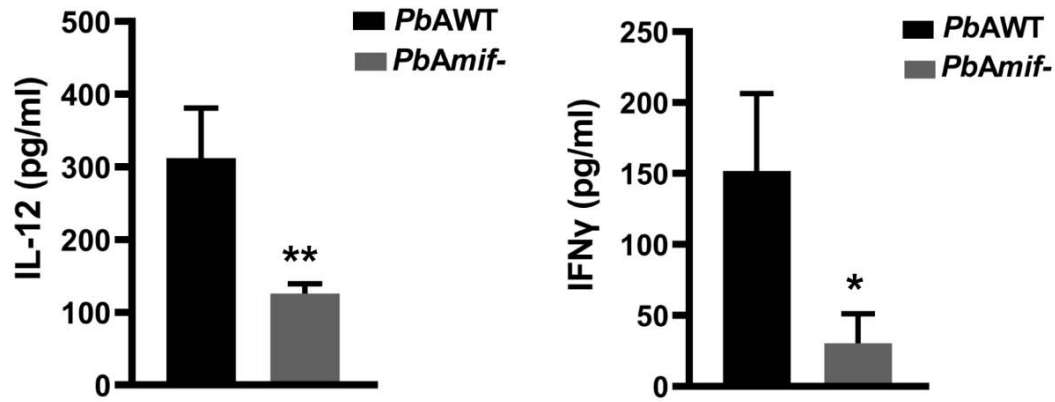

B

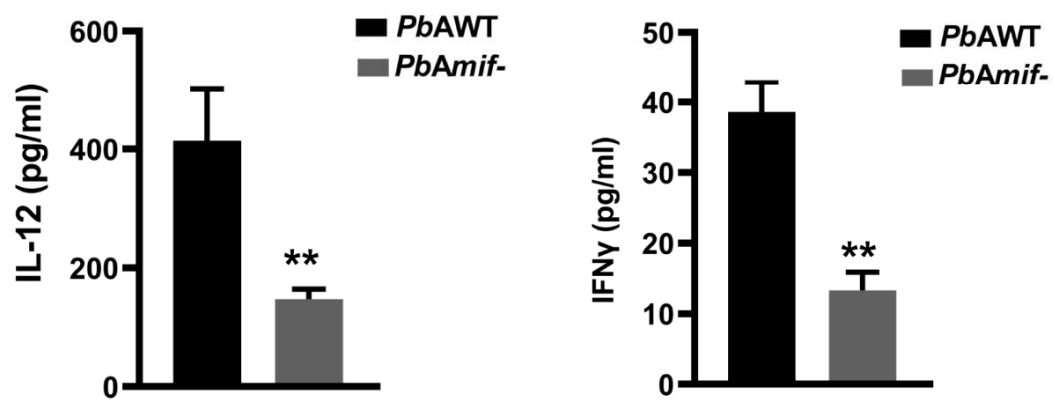

**Fig S3**

**A**

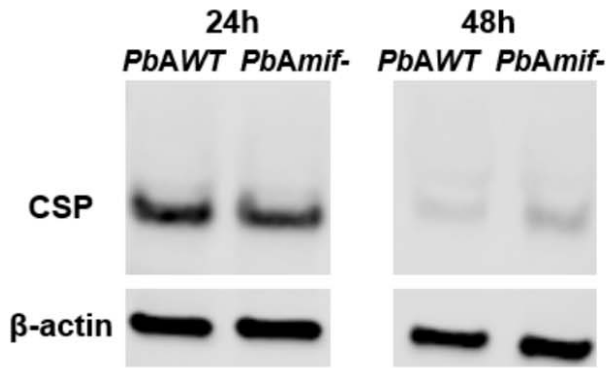

**B**

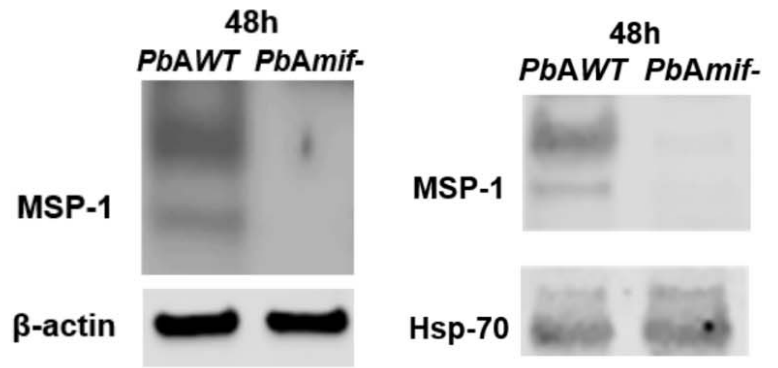

**C**

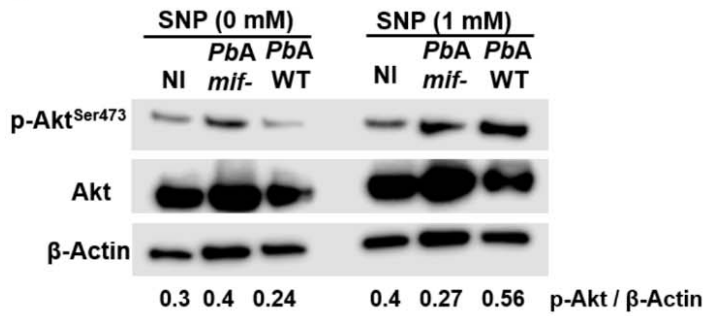

**D**

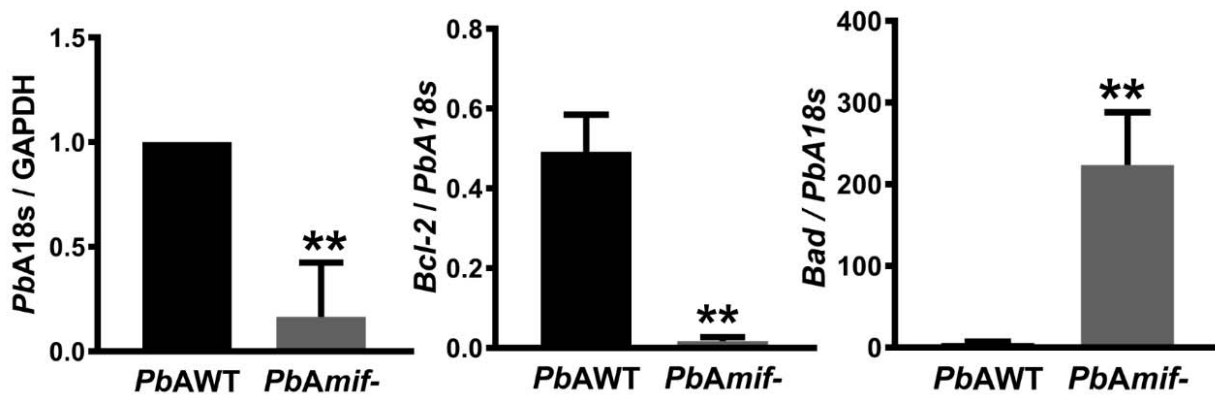

**E**

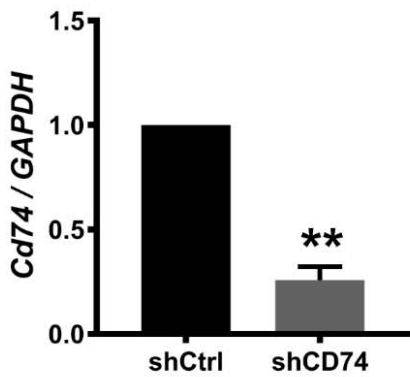

**F**

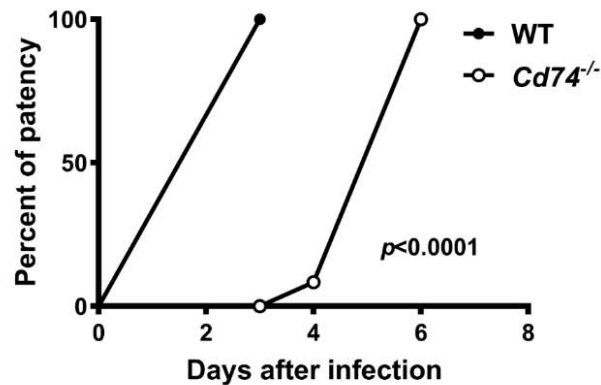

**Fig S4**

**A**

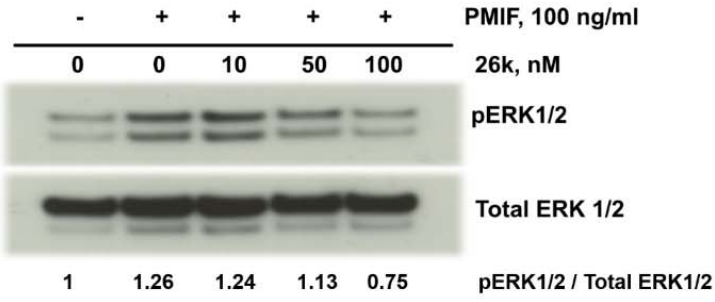

**B**

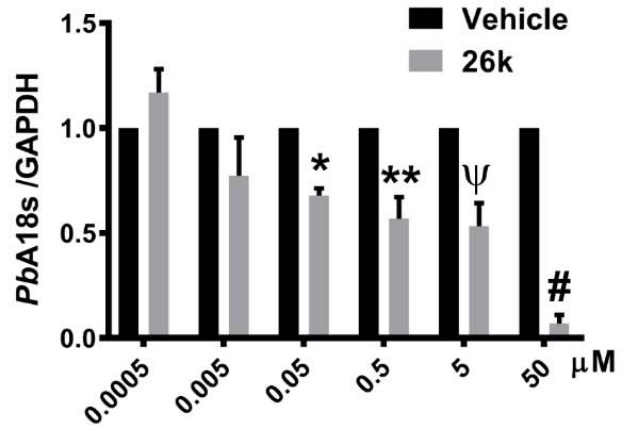

**C**

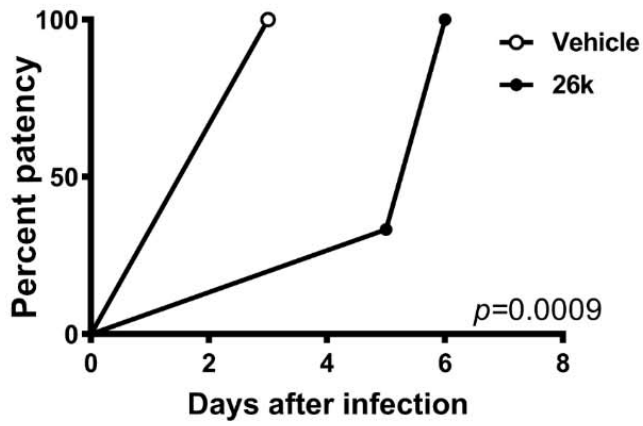

**D**

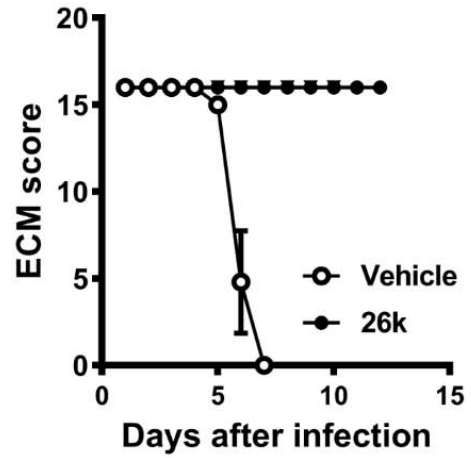

**E**

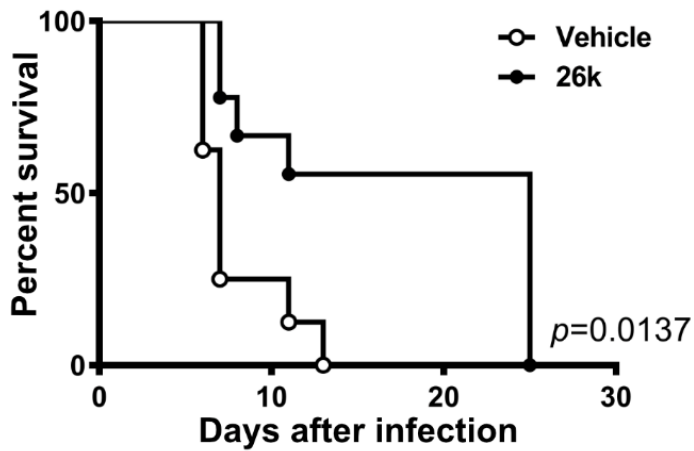

Supplement: NIHMS1788970-supplement-1.pdf [file NIHMS1788970-supplement-1.pdf]
